# Supplementary material
Source: ML conference proceedings conference paper supplement (https://aclanthology.org/2023.conll-1.39)
Supplement: Software [file 2023.conll-1.39.Software.zip]

In the following results, "M." stands for mean and "W." stands for weighted

| Dataset          | BERT<br>pre-trained | random       | RoBERTa<br>pre-trained | random       |
|------------------|---------------------|--------------|------------------------|--------------|
| EWT-PoS          | 79.93               | <b>31.48</b> | 84.33                  | <b>28.83</b> |
| PTB-PoS          | 84.31               | <b>48.84</b> | 84.86                  | <b>47.99</b> |
| OntoNotes-PoS    | 82.98               | <b>27.98</b> | 84.17                  | <b>40.82</b> |
| CoNLL-2003-NER   | 86.6                | <b>57.34</b> | 89.44                  | <b>58.14</b> |
| OntoNotes-NER    | 84.55               | <b>38.53</b> | 87.38                  | <b>41.77</b> |
| DPR              | 59.94               | <b>49.7</b>  | 51.63                  | 50.3         |
| OntoNotes-Coref  | 85.91               | <b>73.09</b> | 87.4                   | <b>73.12</b> |
| EWT-Syn-Dep-Cls  | 80.57               | <b>42.43</b> | 81.63                  | <b>42.35</b> |
| PTB-Syn-Dep-Cls  | 86.85               | <b>44.12</b> | 87.42                  | <b>44</b>    |
| EWT-Syn-Dep-Pred | 79.26               | <b>72.65</b> | 81.38                  | <b>73.41</b> |
| PTB-Syn-Dep-Pred | 86.72               | <b>80.05</b> | 86.19                  | <b>81.17</b> |
| SPR-1*           | 81.97               | <b>63.68</b> | 83.7                   | <b>63.5</b>  |
| SPR-2*           | 77.91               | <b>72.06</b> | 77.31                  | <b>71.5</b>  |
| CoNLL-Chunking   | 84.88               | <b>50.15</b> | 86.97                  | <b>50.54</b> |
| OntoNotes-Const  | 70.55               | <b>49</b>    | 71.05                  | <b>49.44</b> |
| OntoNotes-SRL    | 80.26               | <b>51.06</b> | 80.86                  | <b>51.34</b> |
| Semeval-Rel-Cls  | 65.04               | <b>26.01</b> | 63.8                   | <b>26.03</b> |

**Table 1:** Accuracy scores (Micro f1 for \*) on the filtered EP test dataset, random vs pre-trained encoders with the MLP classifier. **Bold** indicates where the random encoders have a *significantly lower* score than the pre-trained ones, and *italicized* indicates they have a higher score.

| Probe                           | Filter    | Accuracy | W. Prec | W. Recall | W. F1 | M. Recall | Macro F1 | M. Prec |
|---------------------------------|-----------|----------|---------|-----------|-------|-----------|----------|---------|
| Bert base cased, linear         | No Filter | 96.83    | 96.8    | 96.83     | 96.81 | 54.16     | 54.19    | 54.26   |
|                                 | Mem-Unif  | 93.38    | 93.28   | 93.38     | 93.31 | 51.79     | 51.77    | 51.85   |
|                                 | Mem-Freq  | 96.22    | 96.18   | 96.22     | 96.19 | 52.24     | 52.23    | 52.33   |
|                                 | Mem-Ex    | 87.96    | 87.83   | 87.96     | 87.81 | 45.9      | 45.49    | 45.49   |
| Bert base cased, linear, random | No Filter | 82.8     | 74.1    | 82.8      | 76.96 | 15.65     | 16.54    | 23.03   |
|                                 | Mem-Unif  | 71.94    | 60.22   | 71.94     | 62.22 | 14.98     | 14.83    | 22.88   |
|                                 | Mem-Freq  | 80.79    | 71.16   | 80.79     | 74.46 | 15.6      | 16.35    | 22.17   |
|                                 | Mem-Ex    | 54.26    | 44.76   | 54.26     | 41.12 | 14.2      | 12.08    | 20.2    |
| Roberta base, linear            | No Filter | 97.01    | 97.06   | 97.01     | 97.01 | 55.04     | 54.45    | 54.04   |
|                                 | Mem-Unif  | 93.64    | 93.74   | 93.64     | 93.63 | 52.35     | 51.69    | 51.27   |
|                                 | Mem-Freq  | 96.45    | 96.53   | 96.45     | 96.46 | 53.37     | 52.68    | 52.21   |
|                                 | Mem-Ex    | 88.65    | 88.89   | 88.65     | 88.65 | 47.11     | 45.93    | 45.33   |
| Roberta base, linear, random    | No Filter | 82.58    | 74.19   | 82.58     | 76.63 | 15.27     | 16.01    | 23.94   |
|                                 | Mem-Unif  | 71.86    | 60.92   | 71.86     | 62.06 | 14.8      | 14.59    | 24.13   |
|                                 | Mem-Freq  | 80.61    | 71.38   | 80.61     | 74.17 | 15.18     | 15.83    | 23.72   |
|                                 | Mem-Ex    | 54.42    | 47.28   | 54.42     | 41.36 | 14.06     | 11.87    | 22.78   |
| Bert base cased, mlp            | No Filter | 96.94    | 97.1    | 96.94     | 96.98 | 55.44     | 54.35    | 53.58   |
|                                 | Mem-Unif  | 92.99    | 93.35   | 92.99     | 93.08 | 52.33     | 51.12    | 50.33   |
|                                 | Mem-Freq  | 96.36    | 96.58   | 96.36     | 96.43 | 54        | 52.68    | 51.72   |
|                                 | Mem-Ex    | 86.6     | 87.76   | 86.6      | 87.03 | 46.71     | 44.94    | 43.83   |
| Bert base cased, mlp, random    | No Filter | 85.03    | 82.58   | 85.03     | 80.55 | 20.99     | 24.35    | 44.93   |
|                                 | Mem-Unif  | 75.22    | 74.13   | 75.22     | 68.34 | 20.92     | 23.62    | 44.8    |
|                                 | Mem-Freq  | 82.64    | 78.96   | 82.64     | 77.35 | 19.15     | 21.65    | 38.86   |
|                                 | Mem-Ex    | 57.34    | 60.12   | 57.34     | 47.55 | 16.7      | 16.32    | 34.58   |
| Roberta base, mlp               | No Filter | 97.46    | 97.52   | 97.46     | 97.48 | 56.29     | 55.58    | 55.04   |
|                                 | Mem-Unif  | 94.35    | 94.46   | 94.35     | 94.38 | 53.75     | 53       | 52.4    |
|                                 | Mem-Freq  | 96.99    | 97.06   | 96.99     | 97.01 | 54.89     | 54.1     | 53.48   |
|                                 | Mem-Ex    | 89.44    | 89.77   | 89.44     | 89.53 | 48.77     | 47.6     | 46.75   |
| Roberta base, mlp, random       | No Filter | 84.7     | 83.11   | 84.7      | 80.15 | 20.19     | 23.65    | 48.56   |
|                                 | Mem-Unif  | 74.79    | 75.15   | 74.79     | 67.6  | 19.74     | 22.33    | 48.43   |
|                                 | Mem-Freq  | 82.68    | 80.32   | 82.68     | 77.47 | 18.91     | 21.42    | 43.09   |
|                                 | Mem-Ex    | 58.14    | 61.11   | 58.14     | 48.82 | 17.25     | 17.18    | 34.75   |

**Table 2:** CoNLL-2003-NER test results

| Probe                           | Filter    | Accuracy | W. Prec | W. Recall | W. F1 | M. Recall | Macro F1 | M. Prec |
|---------------------------------|-----------|----------|---------|-----------|-------|-----------|----------|---------|
| Bert base cased, linear         | No Filter | 92.93    | 93.55   | 92.93     | 93.03 | 83.64     | 83.08    | 85.45   |
|                                 | Mem-Unif  | 89.27    | 90.18   | 89.27     | 89.34 | 80.25     | 80.56    | 84.72   |
|                                 | Mem-Freq  | 92.63    | 93.06   | 92.63     | 92.67 | 81.96     | 81.39    | 83.84   |
|                                 | Mem-Ex    | 87.95    | 88.67   | 87.95     | 87.93 | 77.05     | 76.76    | 81.42   |
| Bert base cased, linear, random | No Filter | 50.68    | 66.1    | 50.68     | 52.77 | 38.73     | 40.47    | 67.91   |
|                                 | Mem-Unif  | 48.07    | 61.92   | 48.07     | 47.93 | 35.35     | 36.57    | 67.01   |
|                                 | Mem-Freq  | 43.09    | 57.83   | 43.09     | 43.74 | 29.37     | 28.99    | 56.97   |
|                                 | Mem-Ex    | 35.83    | 46.73   | 35.83     | 33.48 | 20.78     | 18.85    | 35.78   |
| Roberta base, linear            | No Filter | 93.91    | 94.36   | 93.91     | 93.96 | 84.94     | 85.9     | 89.58   |
|                                 | Mem-Unif  | 90.48    | 91.29   | 90.48     | 90.57 | 82.57     | 83.68    | 87.76   |
|                                 | Mem-Freq  | 93.42    | 93.87   | 93.42     | 93.45 | 82.96     | 83.5     | 87.32   |
|                                 | Mem-Ex    | 88.83    | 89.64   | 88.83     | 88.86 | 77.02     | 76.47    | 77.71   |
| Roberta base, linear, random    | No Filter | 49.62    | 62.24   | 49.62     | 50.92 | 37.09     | 39.54    | 63.95   |
|                                 | Mem-Unif  | 47       | 56.66   | 47        | 45.97 | 34.04     | 35.51    | 60.09   |
|                                 | Mem-Freq  | 42.39    | 53.75   | 42.39     | 42.5  | 26.3      | 26.2     | 51.44   |
|                                 | Mem-Ex    | 35.11    | 38.23   | 35.11     | 33.29 | 18.96     | 17.05    | 21.52   |
| Bert base cased, mlp            | No Filter | 89.33    | 92.58   | 89.33     | 89.82 | 79.44     | 78.11    | 83.35   |
|                                 | Mem-Unif  | 85.37    | 89.38   | 85.37     | 85.8  | 76.59     | 76.4     | 83.48   |
|                                 | Mem-Freq  | 89.79    | 91.44   | 89.79     | 89.8  | 76.97     | 75.53    | 77.75   |
|                                 | Mem-Ex    | 84.55    | 86.02   | 84.55     | 84.3  | 70.77     | 69.68    | 73.22   |
| Bert base cased, mlp, random    | No Filter | 59.71    | 72.33   | 59.71     | 60.43 | 37.47     | 41.75    | 63.58   |
|                                 | Mem-Unif  | 54.71    | 65.39   | 54.71     | 53.19 | 33.09     | 36.89    | 61.93   |
|                                 | Mem-Freq  | 51.76    | 63.98   | 51.76     | 50.6  | 28.47     | 32.32    | 49.13   |
|                                 | Mem-Ex    | 38.53    | 37.78   | 38.53     | 30.1  | 15.59     | 16.4     | 29.12   |
| Roberta base, mlp               | No Filter | 91.55    | 93.42   | 91.55     | 91.95 | 83.71     | 82.14    | 85.29   |
|                                 | Mem-Unif  | 87.49    | 90.01   | 87.49     | 87.92 | 80.93     | 79.72    | 84.01   |
|                                 | Mem-Freq  | 92.5     | 93.34   | 92.5      | 92.56 | 82.07     | 80.57    | 80.91   |
|                                 | Mem-Ex    | 87.38    | 88.46   | 87.38     | 87.3  | 75.93     | 74.18    | 75.03   |
| Roberta base, mlp, random       | No Filter | 59.05    | 70.95   | 59.05     | 59.78 | 40.22     | 44.82    | 66.82   |
|                                 | Mem-Unif  | 54.9     | 64.75   | 54.9      | 53.82 | 36.75     | 41.38    | 65.02   |
|                                 | Mem-Freq  | 52.3     | 63.77   | 52.3      | 51.04 | 30.49     | 34.02    | 58.77   |
|                                 | Mem-Ex    | 41.77    | 42.88   | 41.77     | 34.83 | 18.88     | 20.48    | 38.22   |

**Table 3:** OntoNotes-NER test results

| Probe                           | Filter    | Accuracy | W. Prec | W. Recall | W. F1 | M. Recall | Macro F1 | M. Prec |
|---------------------------------|-----------|----------|---------|-----------|-------|-----------|----------|---------|
| Bert base cased, linear         | No Filter | 96.54    | 96.58   | 96.54     | 96.54 | 92.97     | 92.42    | 92.53   |
|                                 | Mem-Unif  | 96.41    | 96.42   | 96.41     | 96.4  | 89.36     | 89.62    | 90.41   |
|                                 | Mem-Freq  | 93.87    | 94.04   | 93.87     | 93.85 | 88.39     | 87.48    | 89.24   |
|                                 | Mem-Ex    | 81.62    | 81.47   | 81.62     | 81.14 | 35.01     | 32.17    | 32.25   |
| Bert base cased, linear, random | No Filter | 62.04    | 76.46   | 62.04     | 58.77 | 58.25     | 60.22    | 77.69   |
|                                 | Mem-Unif  | 67.92    | 80.47   | 67.92     | 65.93 | 53.51     | 56.14    | 75.21   |
|                                 | Mem-Freq  | 38.27    | 49.65   | 38.27     | 29.65 | 46.11     | 44.98    | 61.42   |
|                                 | Mem-Ex    | 17.43    | 28.17   | 17.43     | 7.26  | 3.53      | 1.67     | 3.53    |
| Roberta base, linear            | No Filter | 96.99    | 97      | 96.99     | 96.98 | 93.54     | 93.41    | 93.9    |
|                                 | Mem-Unif  | 96.79    | 96.8    | 96.79     | 96.78 | 90.55     | 90.71    | 91.91   |
|                                 | Mem-Freq  | 94.52    | 94.55   | 94.52     | 94.43 | 88.57     | 88.29    | 90.52   |
|                                 | Mem-Ex    | 83.3     | 82.62   | 83.3      | 82.66 | 40.99     | 37.45    | 36.63   |
| Roberta base, linear, random    | No Filter | 61.17    | 79.26   | 61.17     | 57.76 | 57.68     | 59.45    | 79.55   |
|                                 | Mem-Unif  | 67.5     | 82.44   | 67.5      | 65.28 | 52.62     | 54.25    | 72.77   |
|                                 | Mem-Freq  | 36.34    | 49      | 36.34     | 26.97 | 43.1      | 41.33    | 60.05   |
|                                 | Mem-Ex    | 17.29    | 24.71   | 17.29     | 5.86  | 2.08      | 0.78     | 1.89    |
| Bert base cased, mlp            | No Filter | 97.34    | 97.38   | 97.34     | 97.35 | 93.72     | 92.71    | 92.4    |
|                                 | Mem-Unif  | 97.05    | 97.08   | 97.05     | 97.05 | 88.81     | 87.99    | 87.91   |
|                                 | Mem-Freq  | 95.15    | 95.26   | 95.15     | 95.13 | 89.18     | 88.1     | 89.23   |
|                                 | Mem-Ex    | 82.98    | 83.03   | 82.98     | 82.69 | 36.17     | 33.34    | 33.21   |
| Bert base cased, mlp, random    | No Filter | 79.95    | 83.55   | 79.95     | 79.89 | 68.16     | 69.49    | 75.41   |
|                                 | Mem-Unif  | 82.3     | 84.77   | 82.3      | 82.23 | 63.35     | 64.92    | 71.85   |
|                                 | Mem-Freq  | 60.36    | 67.05   | 60.36     | 59.13 | 56.94     | 56.36    | 65.49   |
|                                 | Mem-Ex    | 27.98    | 37.61   | 27.98     | 24.74 | 8.59      | 7.74     | 11.24   |
| Roberta base, mlp               | No Filter | 97.45    | 97.48   | 97.45     | 97.45 | 92.44     | 91.41    | 90.86   |
|                                 | Mem-Unif  | 97.3     | 97.32   | 97.3      | 97.3  | 89.84     | 89.32    | 89.22   |
|                                 | Mem-Freq  | 95.06    | 95.15   | 95.06     | 95.03 | 87.11     | 86.19    | 86.64   |
|                                 | Mem-Ex    | 84.17    | 83.98   | 84.17     | 83.81 | 38.54     | 36.11    | 35.85   |
| Roberta base, mlp, random       | No Filter | 78.12    | 83.61   | 78.12     | 78.76 | 68.07     | 69.97    | 78.9    |
|                                 | Mem-Unif  | 80.99    | 85.33   | 80.99     | 81.58 | 63.03     | 64.17    | 72.46   |
|                                 | Mem-Freq  | 56.26    | 65.32   | 56.26     | 55.1  | 51.96     | 51.31    | 65.46   |
|                                 | Mem-Ex    | 40.82    | 33.51   | 40.82     | 29.82 | 4.39      | 4.18     | 6.36    |

**Table 4:** OntoNotes-PoS test results

| Probe                           | Filter    | Accuracy | W. Prec | W. Recall | W. F1 | M. Recall | Macro F1 | M. Prec |
|---------------------------------|-----------|----------|---------|-----------|-------|-----------|----------|---------|
| Bert base cased, linear         | No Filter | 94.38    | 94.35   | 94.38     | 94.35 | 91.58     | 92.02    | 92.69   |
|                                 | Mem-Unif  | 92.96    | 92.92   | 92.96     | 92.91 | 89.72     | 90.14    | 90.82   |
|                                 | Mem-Freq  | 92.07    | 92.09   | 92.07     | 92.04 | 88.18     | 88.36    | 88.9    |
|                                 | Mem-Ex    | 79.74    | 80.34   | 79.74     | 79.78 | 65.49     | 62.33    | 66.4    |
| Bert base cased, linear, random | No Filter | 63.47    | 65.34   | 63.47     | 60.18 | 57.35     | 56.45    | 70.26   |
|                                 | Mem-Unif  | 65.31    | 67.29   | 65.31     | 62.58 | 55.93     | 55.01    | 63.93   |
|                                 | Mem-Freq  | 52.25    | 48.45   | 52.25     | 46.1  | 43.21     | 41.84    | 56.93   |
|                                 | Mem-Ex    | 25.93    | 13.06   | 25.93     | 15.78 | 14.41     | 10.7     | 13.66   |
| Roberta base, linear            | No Filter | 95.51    | 95.5    | 95.51     | 95.49 | 92.97     | 93.29    | 93.81   |
|                                 | Mem-Unif  | 94.12    | 94.1    | 94.12     | 94.08 | 90.79     | 91.24    | 92.09   |
|                                 | Mem-Freq  | 93.65    | 93.7    | 93.65     | 93.63 | 90.15     | 90.22    | 90.8    |
|                                 | Mem-Ex    | 83.71    | 83.88   | 83.71     | 83.58 | 79.04     | 74.51    | 73.78   |
| Roberta base, linear, random    | No Filter | 62.14    | 64.65   | 62.14     | 59.04 | 55.34     | 54.87    | 69.64   |
|                                 | Mem-Unif  | 63.93    | 66.05   | 63.93     | 61.31 | 54.4      | 53.78    | 62.4    |
|                                 | Mem-Freq  | 51.24    | 47.84   | 51.24     | 45.75 | 41.79     | 40.07    | 51.09   |
|                                 | Mem-Ex    | 24.61    | 10.85   | 24.61     | 15.02 | 8.76      | 6.08     | 4.97    |
| Bert base cased, mlp            | No Filter | 94.88    | 94.9    | 94.88     | 94.87 | 91.94     | 92.58    | 93.34   |
|                                 | Mem-Unif  | 93.22    | 93.24   | 93.22     | 93.2  | 89.92     | 90.52    | 91.29   |
|                                 | Mem-Freq  | 93.03    | 93.02   | 93.03     | 92.99 | 87.64     | 89.05    | 90.99   |
|                                 | Mem-Ex    | 79.93    | 80.53   | 79.93     | 79.97 | 63.72     | 55.41    | 56.59   |
| Bert base cased, mlp, random    | No Filter | 73.79    | 80.37   | 73.79     | 71.48 | 66.36     | 67.39    | 79.21   |
|                                 | Mem-Unif  | 73.28    | 79.26   | 73.28     | 70.87 | 63.28     | 63.94    | 77.24   |
|                                 | Mem-Freq  | 62.23    | 71.29   | 62.23     | 57.66 | 53.57     | 54.7     | 69.92   |
|                                 | Mem-Ex    | 31.48    | 42.37   | 31.48     | 19.45 | 14.95     | 13.65    | 25.69   |
| Roberta base, mlp               | No Filter | 96.26    | 96.24   | 96.26     | 96.24 | 93.74     | 94.15    | 94.75   |
|                                 | Mem-Unif  | 94.93    | 94.91   | 94.93     | 94.9  | 91.77     | 92.41    | 93.32   |
|                                 | Mem-Freq  | 94.65    | 94.66   | 94.65     | 94.62 | 91.81     | 92.16    | 93.01   |
|                                 | Mem-Ex    | 84.33    | 84.63   | 84.33     | 84.3  | 78.79     | 75.91    | 75.71   |
| Roberta base, mlp, random       | No Filter | 72.09    | 79.75   | 72.09     | 69.64 | 63.9      | 65.25    | 81.69   |
|                                 | Mem-Unif  | 72.09    | 79.27   | 72.09     | 69.7  | 61.54     | 62.44    | 73.53   |
|                                 | Mem-Freq  | 60.48    | 70.6    | 60.48     | 55.55 | 49.83     | 51.17    | 71.68   |
|                                 | Mem-Ex    | 28.83    | 52.36   | 28.83     | 16.11 | 6.19      | 4.09     | 13.16   |

**Table 5:** EWT-PoS test results

| Probe                           | Filter    | Accuracy | W. Prec | W. Recall | W. F1 | M. Recall | Macro F1 | M. Prec |
|---------------------------------|-----------|----------|---------|-----------|-------|-----------|----------|---------|
| Bert base cased, linear         | No Filter | 96.76    | 96.97   | 96.76     | 96.83 | 90.68     | 91.25    | 93.58   |
|                                 | Mem-Unif  | 95.54    | 95.77   | 95.54     | 95.6  | 70.15     | 70.94    | 73.47   |
|                                 | Mem-Freq  | 96.27    | 96.56   | 96.27     | 96.36 | 89.42     | 89.75    | 92.3    |
|                                 | Mem-Ex    | 83.33    | 84.39   | 83.33     | 83.28 | 25.51     | 25.49    | 28.1    |
| Bert base cased, linear, random | No Filter | 66.04    | 73.18   | 66.04     | 65.9  | 63.81     | 64.93    | 72.51   |
|                                 | Mem-Unif  | 67.93    | 74      | 67.93     | 67.71 | 45.73     | 46.26    | 51.49   |
|                                 | Mem-Freq  | 59.65    | 68.86   | 59.65     | 59.42 | 57.48     | 57.22    | 64.86   |
|                                 | Mem-Ex    | 24.79    | 39.33   | 24.79     | 24.84 | 4.38      | 4.23     | 5.88    |
| Roberta base, linear            | No Filter | 97.05    | 97.28   | 97.05     | 97.13 | 90.39     | 90.16    | 91.12   |
|                                 | Mem-Unif  | 96.02    | 96.28   | 96.02     | 96.09 | 73.69     | 73.29    | 74.36   |
|                                 | Mem-Freq  | 96.41    | 96.72   | 96.41     | 96.52 | 88.76     | 88.15    | 89.17   |
|                                 | Mem-Ex    | 83.52    | 84.23   | 83.52     | 83.45 | 26        | 25.66    | 26.83   |
| Roberta base, linear, random    | No Filter | 65.55    | 74      | 65.55     | 64.83 | 63.11     | 64.57    | 72.91   |
|                                 | Mem-Unif  | 67.98    | 74.72   | 67.98     | 66.99 | 46.26     | 47.13    | 53.98   |
|                                 | Mem-Freq  | 58.58    | 69.55   | 58.58     | 57.58 | 57.56     | 57.49    | 69.45   |
|                                 | Mem-Ex    | 19.9     | 32.39   | 19.9      | 17.76 | 3.17      | 2.73     | 4.85    |
| Bert base cased, mlp            | No Filter | 97.1     | 97.38   | 97.1      | 97.19 | 87.84     | 87.81    | 90.61   |
|                                 | Mem-Unif  | 95.95    | 96.26   | 95.95     | 96.03 | 70.33     | 70.64    | 72.97   |
|                                 | Mem-Freq  | 96.53    | 96.89   | 96.53     | 96.65 | 86.78     | 86.14    | 88.58   |
|                                 | Mem-Ex    | 84.31    | 84.97   | 84.31     | 84.22 | 27.45     | 26.16    | 26.28   |
| Bert base cased, mlp, random    | No Filter | 82.87    | 86.15   | 82.87     | 83.15 | 71.76     | 73.37    | 76.78   |
|                                 | Mem-Unif  | 81.28    | 84.84   | 81.28     | 81.73 | 53.33     | 54.2     | 56.97   |
|                                 | Mem-Freq  | 78.03    | 82.28   | 78.03     | 78.1  | 67.8      | 68.39    | 72.14   |
|                                 | Mem-Ex    | 48.84    | 46.34   | 48.84     | 43.65 | 7.08      | 7.89     | 10.71   |
| Roberta base, mlp               | No Filter | 97.42    | 97.69   | 97.42     | 97.52 | 90.91     | 89.94    | 90.79   |
|                                 | Mem-Unif  | 96.28    | 96.57   | 96.28     | 96.36 | 73.97     | 72.6     | 73.81   |
|                                 | Mem-Freq  | 96.89    | 97.23   | 96.89     | 97    | 89.97     | 88.48    | 89.04   |
|                                 | Mem-Ex    | 84.86    | 85.52   | 84.86     | 84.89 | 28.49     | 27.98    | 28.29   |
| Roberta base, mlp, random       | No Filter | 81.81    | 86.47   | 81.81     | 82.28 | 70.3      | 72.18    | 76.95   |
|                                 | Mem-Unif  | 80.15    | 85.38   | 80.15     | 80.96 | 53.85     | 55.23    | 60.07   |
|                                 | Mem-Freq  | 76.92    | 83.06   | 76.92     | 77.2  | 66.27     | 67.16    | 72.43   |
|                                 | Mem-Ex    | 47.99    | 43.63   | 47.99     | 39.12 | 5.29      | 5.39     | 8.41    |

**Table 6:** PTB-PoS test results

| Probe                           | Filter    | Accuracy | W. Prec | W. Recall | W. F1 | M. Recall | Macro F1 | M. Prec |
|---------------------------------|-----------|----------|---------|-----------|-------|-----------|----------|---------|
| Bert base cased, linear         | No Filter | 73.26    | 73.01   | 73.26     | 72.13 | 24.01     | 25.54    | 30.14   |
|                                 | Mem-Unif  | 68.67    | 68.1    | 68.67     | 66.98 | 21.84     | 23.36    | 28.31   |
|                                 | Mem-Freq  | 72.45    | 72.27   | 72.45     | 71.24 | 23.61     | 25.19    | 29.92   |
|                                 | Mem-Ex    | 67.79    | 67.21   | 67.79     | 65.95 | 21.87     | 23.22    | 28.09   |
| Bert base cased, linear, random | No Filter | 50.96    | 56.69   | 50.96     | 45.73 | 10.05     | 10.51    | 17.27   |
|                                 | Mem-Unif  | 45.68    | 49.8    | 45.68     | 37.65 | 8.37      | 8.59     | 15.88   |
|                                 | Mem-Freq  | 49.57    | 55.5    | 49.57     | 43.85 | 9.56      | 9.96     | 16.7    |
|                                 | Mem-Ex    | 44.45    | 47.9    | 44.45     | 35.42 | 7.58      | 7.85     | 15.21   |
| Roberta base, linear            | No Filter | 74.55    | 74.71   | 74.55     | 73.35 | 22.55     | 24.54    | 32.12   |
|                                 | Mem-Unif  | 69.69    | 69.78   | 69.69     | 67.93 | 20.46     | 22.48    | 30.97   |
|                                 | Mem-Freq  | 73.62    | 73.9    | 73.62     | 72.34 | 21.97     | 24.03    | 31.94   |
|                                 | Mem-Ex    | 68.71    | 69.03   | 68.71     | 66.8  | 19.83     | 21.97    | 30.75   |
| Roberta base, linear, random    | No Filter | 51.5     | 56.95   | 51.5      | 47.37 | 10.43     | 11.15    | 20.23   |
|                                 | Mem-Unif  | 46.16    | 49.7    | 46.16     | 39.35 | 8.71      | 9.23     | 19.03   |
|                                 | Mem-Freq  | 50.22    | 56.18   | 50.22     | 45.61 | 10        | 10.65    | 19.97   |
|                                 | Mem-Ex    | 44.96    | 47.62   | 44.96     | 37.16 | 7.95      | 8.47     | 16.92   |
| Bert base cased, mlp            | No Filter | 84.62    | 83.72   | 84.62     | 83.86 | 27.98     | 29.11    | 31.57   |
|                                 | Mem-Unif  | 81.01    | 79.71   | 81.01     | 79.92 | 26.1      | 27.33    | 30.2    |
|                                 | Mem-Freq  | 83.88    | 82.93   | 83.88     | 83.07 | 27.52     | 28.71    | 31.26   |
|                                 | Mem-Ex    | 80.26    | 78.84   | 80.26     | 79.06 | 25.64     | 26.85    | 29.72   |
| Bert base cased, mlp, random    | No Filter | 59.81    | 62.91   | 59.81     | 57.11 | 13.01     | 13.81    | 18.76   |
|                                 | Mem-Unif  | 52.68    | 54.74   | 52.68     | 48    | 11.07     | 11.73    | 17.06   |
|                                 | Mem-Freq  | 58.01    | 61.38   | 58.01     | 55    | 12.4      | 13.17    | 18.42   |
|                                 | Mem-Ex    | 51.06    | 52.91   | 51.06     | 45.66 | 10.13     | 10.92    | 16.98   |
| Roberta base, mlp               | No Filter | 85.22    | 84.57   | 85.22     | 84.45 | 28.29     | 29.49    | 33.62   |
|                                 | Mem-Unif  | 81.56    | 80.6    | 81.56     | 80.45 | 25.87     | 27.22    | 32.11   |
|                                 | Mem-Freq  | 84.51    | 83.81   | 84.51     | 83.67 | 27.83     | 29.08    | 33.29   |
|                                 | Mem-Ex    | 80.86    | 79.82   | 80.86     | 79.66 | 25.79     | 26.98    | 31.84   |
| Roberta base, mlp, random       | No Filter | 59.58    | 62.27   | 59.58     | 56.75 | 12.62     | 13.37    | 19.51   |
|                                 | Mem-Unif  | 52.9     | 54.48   | 52.9      | 48.37 | 10.84     | 11.33    | 17.38   |
|                                 | Mem-Freq  | 57.8     | 60.75   | 57.8      | 54.67 | 12        | 12.69    | 19.42   |
|                                 | Mem-Ex    | 51.34    | 52.71   | 51.34     | 46.17 | 9.81      | 10.3     | 16.59   |

**Table 7: OntoNotes-SRL test results**

| Probe                           | Filter    | Accuracy | W. Prec | W. Recall | W. F1 | M. Recall | Macro F1 | M. Prec |
|---------------------------------|-----------|----------|---------|-----------|-------|-----------|----------|---------|
| Bert base cased, linear         | No Filter | 92.57    | 92.52   | 92.57     | 92.5  | 56.3      | 55.34    | 57.17   |
|                                 | Mem-Unif  | 91.69    | 91.62   | 91.69     | 91.6  | 54.88     | 54.4     | 56.41   |
|                                 | Mem-Freq  | 86.68    | 86.58   | 86.68     | 86.51 | 50.93     | 50.48    | 52.67   |
|                                 | Mem-Ex    | 81.43    | 80.92   | 81.43     | 80.86 | 27.27     | 26.59    | 28.59   |
| Bert base cased, linear, random | No Filter | 67.48    | 71.61   | 67.48     | 65.7  | 24.69     | 25.9     | 36.04   |
|                                 | Mem-Unif  | 67.18    | 71.42   | 67.18     | 65.42 | 24.76     | 25.79    | 35.6    |
|                                 | Mem-Freq  | 48.85    | 46.89   | 48.85     | 42.99 | 16.33     | 16.54    | 21.18   |
|                                 | Mem-Ex    | 50.29    | 41      | 50.29     | 40.51 | 5.15      | 4.45     | 5.78    |
| Roberta base, linear            | No Filter | 94.35    | 94.3    | 94.35     | 94.29 | 60.85     | 60.22    | 61.35   |
|                                 | Mem-Unif  | 93.39    | 93.32   | 93.39     | 93.31 | 61.16     | 59.97    | 60.95   |
|                                 | Mem-Freq  | 89.31    | 89.28   | 89.31     | 89.19 | 58.12     | 58.04    | 59.7    |
|                                 | Mem-Ex    | 84.4     | 83.9    | 84.4      | 83.77 | 25.91     | 25.06    | 26.84   |
| Roberta base, linear, random    | No Filter | 66.42    | 70.43   | 66.42     | 64.86 | 24.56     | 25.24    | 34.92   |
|                                 | Mem-Unif  | 66.28    | 70.45   | 66.28     | 64.92 | 25.12     | 25.55    | 34.52   |
|                                 | Mem-Freq  | 48.91    | 49.07   | 48.91     | 43.63 | 16.41     | 16.19    | 25.73   |
|                                 | Mem-Ex    | 50.81    | 41.09   | 50.81     | 41.97 | 5.28      | 4.63     | 5.94    |
| Bert base cased, mlp            | No Filter | 94.69    | 94.7    | 94.69     | 94.67 | 60.22     | 58.46    | 60.06   |
|                                 | Mem-Unif  | 93.75    | 93.78   | 93.75     | 93.73 | 59.43     | 57.57    | 59.23   |
|                                 | Mem-Freq  | 90.29    | 90.23   | 90.29     | 90.2  | 55.56     | 54.35    | 54.92   |
|                                 | Mem-Ex    | 84.88    | 84.39   | 84.88     | 84.38 | 27.83     | 27.84    | 31.79   |
| Bert base cased, mlp, random    | No Filter | 74.19    | 78.18   | 74.19     | 72.37 | 25.59     | 28.03    | 37.66   |
|                                 | Mem-Unif  | 66.97    | 71.62   | 66.97     | 65.21 | 23.61     | 25.13    | 35.41   |
|                                 | Mem-Freq  | 48.52    | 46.85   | 48.52     | 42.36 | 15.14     | 15.69    | 20.79   |
|                                 | Mem-Ex    | 50.15    | 42.11   | 50.15     | 39.88 | 5.13      | 4.43     | 6.05    |
| Roberta base, mlp               | No Filter | 95.76    | 95.78   | 95.76     | 95.74 | 64.08     | 62.47    | 62.66   |
|                                 | Mem-Unif  | 94.92    | 94.93   | 94.92     | 94.89 | 63.05     | 61.95    | 62.42   |
|                                 | Mem-Freq  | 92.06    | 92.1    | 92.06     | 92    | 61.89     | 61.35    | 62.13   |
|                                 | Mem-Ex    | 86.97    | 86.58   | 86.97     | 86.5  | 26.86     | 26.03    | 27.2    |
| Roberta base, mlp, random       | No Filter | 73.99    | 77.74   | 73.99     | 72.53 | 27.62     | 29.28    | 35.94   |
|                                 | Mem-Unif  | 66.11    | 69.82   | 66.11     | 64.83 | 25.72     | 26.08    | 34.81   |
|                                 | Mem-Freq  | 48.5     | 46.66   | 48.5      | 43.6  | 16.94     | 16.71    | 21.41   |
|                                 | Mem-Ex    | 50.54    | 40.27   | 50.54     | 42.47 | 5.33      | 4.75     | 5.51    |

**Table 8: CoNLL-Chunking test results**

| Probe                           | Filter    | Accuracy | W. Prec | W. Recall | W. F1 | M. Recall | Macro F1 | M. Prec |
|---------------------------------|-----------|----------|---------|-----------|-------|-----------|----------|---------|
| Bert base cased, linear         | No Filter | 55.72    | 58.19   | 55.72     | 53.95 | 46.23     | 47.33    | 58.93   |
|                                 | Mem-Unif  | 55.14    | 56.51   | 55.14     | 53.21 | 45.14     | 45.98    | 53.18   |
|                                 | Mem-Freq  | 55.67    | 58.11   | 55.67     | 53.89 | 46.16     | 47.26    | 58.86   |
|                                 | Mem-Ex    | 55.1     | 56.43   | 55.1      | 53.16 | 45.1      | 45.93    | 53.13   |
| Bert base cased, linear, random | No Filter | 22.56    | 35.55   | 22.56     | 17.02 | 12.4      | 11.99    | 30.13   |
|                                 | Mem-Unif  | 22.37    | 34.59   | 22.37     | 16.7  | 11.82     | 11.32    | 29.13   |
|                                 | Mem-Freq  | 22.59    | 35.57   | 22.59     | 17.05 | 12.4      | 12       | 30.13   |
|                                 | Mem-Ex    | 22.39    | 34.57   | 22.39     | 16.72 | 11.82     | 11.33    | 29.13   |
| Roberta base, linear            | No Filter | 51.6     | 57.75   | 51.6      | 49.17 | 38.55     | 40.12    | 53.07   |
|                                 | Mem-Unif  | 50.93    | 56.73   | 50.93     | 48.28 | 37.69     | 39.12    | 52.26   |
|                                 | Mem-Freq  | 51.58    | 57.73   | 51.58     | 49.15 | 38.53     | 40.09    | 53.05   |
|                                 | Mem-Ex    | 50.88    | 56.65   | 50.88     | 48.2  | 37.62     | 39.03    | 52.18   |
| Roberta base, linear, random    | No Filter | 24.48    | 26.19   | 24.48     | 19.85 | 16.34     | 14.81    | 21.93   |
|                                 | Mem-Unif  | 24.4     | 26.48   | 24.4      | 19.74 | 15.99     | 14.46    | 22.07   |
|                                 | Mem-Freq  | 24.48    | 26.2    | 24.48     | 19.86 | 16.34     | 14.81    | 21.93   |
|                                 | Mem-Ex    | 24.35    | 26.32   | 24.35     | 19.65 | 15.92     | 14.36    | 21.88   |
| Bert base cased, mlp            | No Filter | 65.51    | 68.01   | 65.51     | 65.45 | 55.96     | 58.81    | 66.14   |
|                                 | Mem-Unif  | 65.07    | 67.57   | 65.07     | 64.99 | 55.1      | 58.05    | 65.58   |
|                                 | Mem-Freq  | 65.48    | 67.96   | 65.48     | 65.4  | 55.9      | 58.76    | 66.1    |
|                                 | Mem-Ex    | 65.04    | 67.54   | 65.04     | 64.96 | 55.07     | 58.03    | 65.57   |
| Bert base cased, mlp, random    | No Filter | 26.06    | 33.32   | 26.06     | 20.1  | 16.2      | 14.59    | 28.28   |
|                                 | Mem-Unif  | 25.99    | 30.78   | 25.99     | 19.91 | 15.71     | 14.05    | 24.99   |
|                                 | Mem-Freq  | 26.05    | 31.35   | 26.05     | 20.06 | 16.16     | 14.5     | 25.65   |
|                                 | Mem-Ex    | 26.01    | 30.78   | 26.01     | 19.93 | 15.72     | 14.07    | 24.99   |
| Roberta base, mlp               | No Filter | 64.3     | 63.08   | 64.3      | 63.18 | 56.44     | 55.74    | 56.23   |
|                                 | Mem-Unif  | 63.84    | 62.55   | 63.84     | 62.68 | 55.6      | 55.01    | 55.71   |
|                                 | Mem-Freq  | 64.29    | 63.07   | 64.29     | 63.17 | 56.43     | 55.73    | 56.21   |
|                                 | Mem-Ex    | 63.8     | 62.51   | 63.8      | 62.64 | 55.56     | 54.97    | 55.67   |
| Roberta base, mlp, random       | No Filter | 26.39    | 29.66   | 26.39     | 24.09 | 19.98     | 18.03    | 26.62   |
|                                 | Mem-Unif  | 26.08    | 29.57   | 26.08     | 23.84 | 19.56     | 17.6     | 26.28   |
|                                 | Mem-Freq  | 26.4     | 29.66   | 26.4      | 24.1  | 19.98     | 18.04    | 26.62   |
|                                 | Mem-Ex    | 26.03    | 29.55   | 26.03     | 23.81 | 19.5      | 17.55    | 26.24   |

**Table 9:** Semeval-Rel-CIs test results

| Probe                           | Filter    | Accuracy | W. Prec | W. Recall | W. F1 | M. Recall | Macro F1 | M. Prec |
|---------------------------------|-----------|----------|---------|-----------|-------|-----------|----------|---------|
| Bert base cased, linear         | No Filter | 71.74    | 70.92   | 71.74     | 70.65 | 50.14     | 50.69    | 55.16   |
|                                 | Mem-Unif  | 66.78    | 65.8    | 66.78     | 65.38 | 47.43     | 48.02    | 52.89   |
|                                 | Mem-Freq  | 68.6     | 67.66   | 68.6      | 67.29 | 47.33     | 48.08    | 53.3    |
|                                 | Mem-Ex    | 62.17    | 61.01   | 62.17     | 60.45 | 34.44     | 33.64    | 41.63   |
| Bert base cased, linear, random | No Filter | 46.2     | 45      | 46.2      | 41.1  | 25.21     | 26.16    | 37.8    |
|                                 | Mem-Unif  | 42.8     | 40.21   | 42.8      | 36.24 | 24.08     | 25.11    | 36.56   |
|                                 | Mem-Freq  | 42.66    | 40.51   | 42.66     | 36.71 | 19.04     | 20.14    | 33.77   |
|                                 | Mem-Ex    | 38.15    | 34.68   | 38.15     | 30.24 | 9.32      | 8.07     | 16.28   |
| Roberta base, linear            | No Filter | 73.1     | 71.96   | 73.1      | 72.02 | 49.71     | 50.23    | 53.94   |
|                                 | Mem-Unif  | 67.75    | 66.53   | 67.75     | 66.44 | 46.9      | 47.35    | 51.54   |
|                                 | Mem-Freq  | 69.93    | 68.66   | 69.93     | 68.68 | 47        | 47.51    | 51.9    |
|                                 | Mem-Ex    | 62.81    | 61.51   | 62.81     | 61.3  | 36.68     | 34.32    | 38.59   |
| Roberta base, linear, random    | No Filter | 46.91    | 46.39   | 46.91     | 41.93 | 23.97     | 25.48    | 39.06   |
|                                 | Mem-Unif  | 43.17    | 41.7    | 43.17     | 37.17 | 21.61     | 22.3     | 32.79   |
|                                 | Mem-Freq  | 43.14    | 42.08   | 43.14     | 37.59 | 18.65     | 20.12    | 34.72   |
|                                 | Mem-Ex    | 38.21    | 37      | 38.21     | 31.55 | 8.58      | 8.94     | 17.41   |
| Bert base cased, mlp            | No Filter | 79.05    | 78.66   | 79.05     | 78.64 | 56.41     | 56.73    | 59.76   |
|                                 | Mem-Unif  | 74.61    | 74.21   | 74.61     | 74.11 | 54.41     | 54.39    | 57.87   |
|                                 | Mem-Freq  | 76.42    | 76.03   | 76.42     | 75.97 | 53.74     | 54.19    | 57.7    |
|                                 | Mem-Ex    | 70.55    | 70.18   | 70.55     | 69.99 | 42.26     | 41.27    | 46.33   |
| Bert base cased, mlp, random    | No Filter | 60.43    | 62.04   | 60.43     | 58.97 | 37.19     | 37.03    | 46.2    |
|                                 | Mem-Unif  | 55.02    | 56.43   | 55.02     | 53.11 | 34.31     | 33.85    | 42.4    |
|                                 | Mem-Freq  | 56.19    | 57.73   | 56.19     | 54.44 | 31.32     | 31.32    | 42.71   |
|                                 | Mem-Ex    | 49       | 49.41   | 49        | 46.26 | 16.76     | 16.4     | 24.9    |
| Roberta base, mlp               | No Filter | 79.63    | 79.25   | 79.63     | 79.2  | 58.05     | 59.1     | 63.74   |
|                                 | Mem-Unif  | 75.1     | 74.71   | 75.1      | 74.58 | 55.99     | 57.27    | 62.31   |
|                                 | Mem-Freq  | 77.03    | 76.66   | 77.03     | 76.55 | 55.91     | 56.74    | 61.36   |
|                                 | Mem-Ex    | 71.05    | 70.72   | 71.05     | 70.47 | 48.83     | 49.68    | 54.69   |
| Roberta base, mlp, random       | No Filter | 60.62    | 62.44   | 60.62     | 58.39 | 37.04     | 37.55    | 48.01   |
|                                 | Mem-Unif  | 55.36    | 57.22   | 55.36     | 52.43 | 32.58     | 32.94    | 43.09   |
|                                 | Mem-Freq  | 56.41    | 58.17   | 56.41     | 53.71 | 32.02     | 32.58    | 44.5    |
|                                 | Mem-Ex    | 49.44    | 50.15   | 49.44     | 45.17 | 16.41     | 16.34    | 27.21   |

**Table 10:** OntoNotes-Const test results

| Probe                           | Filter    | Accuracy | W. Prec | W. Recall | W. F1 | M. Recall | Macro F1 | M. Prec |
|---------------------------------|-----------|----------|---------|-----------|-------|-----------|----------|---------|
| Bert base cased, linear         | No Filter | 75.96    | 75.4    | 75.96     | 75.12 | 50.83     | 52.5     | 57.16   |
|                                 | Mem-Unif  | 69.61    | 70.29   | 69.61     | 68.89 | 48.06     | 50.04    | 56.3    |
|                                 | Mem-Freq  | 75.86    | 75.56   | 75.86     | 75.06 | 50.16     | 51.91    | 56.83   |
|                                 | Mem-Ex    | 69.35    | 70.6    | 69.35     | 68.83 | 45.97     | 47.93    | 54.46   |
| Bert base cased, linear, random | No Filter | 46.15    | 49.36   | 46.15     | 43.33 | 22.84     | 22.94    | 33.04   |
|                                 | Mem-Unif  | 33.25    | 37.68   | 33.25     | 29.81 | 19.49     | 19.22    | 27.1    |
|                                 | Mem-Freq  | 45.83    | 49.78   | 45.83     | 42.92 | 21.84     | 21.96    | 32.96   |
|                                 | Mem-Ex    | 32.6     | 37.62   | 32.6      | 29.06 | 17.31     | 16.72    | 24.09   |
| Roberta base, linear            | No Filter | 78.12    | 77.01   | 78.12     | 77.06 | 51.64     | 52.85    | 56.77   |
|                                 | Mem-Unif  | 71.94    | 71.92   | 71.94     | 70.89 | 49.09     | 50.42    | 56.18   |
|                                 | Mem-Freq  | 78.15    | 77.22   | 78.15     | 77.11 | 51.44     | 52.62    | 56.8    |
|                                 | Mem-Ex    | 71.78    | 72.29   | 71.78     | 70.89 | 47.57     | 49.2     | 55.58   |
| Roberta base, linear, random    | No Filter | 45.11    | 48.86   | 45.11     | 42.95 | 21.93     | 22.49    | 32.52   |
|                                 | Mem-Unif  | 32.22    | 37.46   | 32.22     | 29.83 | 18.68     | 19.23    | 27.65   |
|                                 | Mem-Freq  | 44.72    | 48.91   | 44.72     | 42.49 | 20.66     | 21.11    | 29.54   |
|                                 | Mem-Ex    | 31.36    | 38.01   | 31.36     | 28.99 | 16.41     | 16.44    | 24.48   |
| Bert base cased, mlp            | No Filter | 86.37    | 86.33   | 86.37     | 85.92 | 60.63     | 62.72    | 68.44   |
|                                 | Mem-Unif  | 81.11    | 81.03   | 81.11     | 80.41 | 57.95     | 59.93    | 66.04   |
|                                 | Mem-Freq  | 85.97    | 85.91   | 85.97     | 85.49 | 60.21     | 62.18    | 67.87   |
|                                 | Mem-Ex    | 80.57    | 80.48   | 80.57     | 79.85 | 56.85     | 58.44    | 64.37   |
| Bert base cased, mlp, random    | No Filter | 58.11    | 59.32   | 58.11     | 56.75 | 29.34     | 29.62    | 34.41   |
|                                 | Mem-Unif  | 44.09    | 45.89   | 44.09     | 42.33 | 25.72     | 25.82    | 30.83   |
|                                 | Mem-Freq  | 56.94    | 58.32   | 56.94     | 55.56 | 28.2      | 28.42    | 33.39   |
|                                 | Mem-Ex    | 42.43    | 44.21   | 42.43     | 40.55 | 22.91     | 22.68    | 26.82   |
| Roberta base, mlp               | No Filter | 87.53    | 87.06   | 87.53     | 86.77 | 60.99     | 62.5     | 67.11   |
|                                 | Mem-Unif  | 82.24    | 81.81   | 82.24     | 81.17 | 58.78     | 59.79    | 64.32   |
|                                 | Mem-Freq  | 87.11    | 86.63   | 87.11     | 86.31 | 60.45     | 61.83    | 66.35   |
|                                 | Mem-Ex    | 81.63    | 81.26   | 81.63     | 80.54 | 57.03     | 57.61    | 62.35   |
| Roberta base, mlp, random       | No Filter | 57.97    | 59.52   | 57.97     | 57.37 | 29.71     | 29.32    | 32.29   |
|                                 | Mem-Unif  | 43.83    | 46.42   | 43.83     | 43.15 | 26.15     | 25.66    | 29.14   |
|                                 | Mem-Freq  | 56.88    | 58.53   | 56.88     | 56.28 | 28.72     | 28.17    | 31.03   |
|                                 | Mem-Ex    | 42.35    | 45.03   | 42.35     | 41.64 | 23.72     | 23.08    | 26.28   |

**Table 11:** EWT-Syn-Dep-Cls test results

| Probe                           | Filter    | Accuracy | W. Prec | W. Recall | W. F1 | M. Recall | Macro F1 | M. Prec |
|---------------------------------|-----------|----------|---------|-----------|-------|-----------|----------|---------|
| Bert base cased, linear         | No Filter | 86.57    | 86.11   | 86.57     | 86.08 | 72.54     | 74.15    | 79.31   |
|                                 | Mem-Unif  | 79.71    | 78.91   | 79.71     | 78.75 | 70.48     | 71.85    | 77.05   |
|                                 | Mem-Freq  | 86.45    | 85.93   | 86.45     | 85.89 | 71.45     | 73.05    | 78.39   |
|                                 | Mem-Ex    | 78.58    | 77.68   | 78.58     | 77.39 | 67.17     | 68.32    | 74.39   |
| Bert base cased, linear, random | No Filter | 52.58    | 54.29   | 52.58     | 50.88 | 37.28     | 36.36    | 44.67   |
|                                 | Mem-Unif  | 37.33    | 39      | 37.33     | 34.53 | 34.54     | 32.69    | 39.03   |
|                                 | Mem-Freq  | 52.07    | 53.79   | 52.07     | 50.43 | 34.67     | 33.79    | 42.02   |
|                                 | Mem-Ex    | 33.59    | 35.52   | 33.59     | 30.81 | 28.84     | 27.21    | 33.01   |
| Roberta base, linear            | No Filter | 87.44    | 86.88   | 87.44     | 86.92 | 74.17     | 74.74    | 77.47   |
|                                 | Mem-Unif  | 80.42    | 79.45   | 80.42     | 79.43 | 71.98     | 72.14    | 74.89   |
|                                 | Mem-Freq  | 87.19    | 86.51   | 87.19     | 86.58 | 73        | 73.41    | 76.22   |
|                                 | Mem-Ex    | 79.19    | 77.68   | 79.19     | 77.86 | 68.13     | 68.18    | 71.3    |
| Roberta base, linear, random    | No Filter | 52.12    | 53.81   | 52.12     | 50.79 | 36.54     | 36.11    | 43.56   |
|                                 | Mem-Unif  | 36.59    | 37.58   | 36.59     | 34.25 | 33.55     | 32.42    | 39.46   |
|                                 | Mem-Freq  | 51.74    | 54      | 51.74     | 50.38 | 34.36     | 33.8     | 42.68   |
|                                 | Mem-Ex    | 32.96    | 34.94   | 32.96     | 30.52 | 27.9      | 26.89    | 35.04   |
| Bert base cased, mlp            | No Filter | 93.15    | 92.99   | 93.15     | 92.85 | 78.62     | 80.1     | 84.96   |
|                                 | Mem-Unif  | 88.31    | 87.98   | 88.31     | 87.69 | 76.55     | 77.72    | 82.47   |
|                                 | Mem-Freq  | 92.7     | 92.47   | 92.7      | 92.34 | 77.52     | 79.12    | 84.12   |
|                                 | Mem-Ex    | 86.85    | 86.31   | 86.85     | 86.03 | 72.83     | 73.94    | 79.09   |
| Bert base cased, mlp, random    | No Filter | 65.15    | 67.81   | 65.15     | 63.57 | 44.11     | 44.99    | 53.27   |
|                                 | Mem-Unif  | 49.54    | 54.36   | 49.54     | 47.27 | 41.24     | 41.42    | 49.99   |
|                                 | Mem-Freq  | 63.62    | 65.92   | 63.62     | 61.8  | 41.67     | 42.16    | 49.42   |
|                                 | Mem-Ex    | 44.12    | 47.41   | 44.12     | 41.34 | 34.85     | 34.75    | 41.41   |
| Roberta base, mlp               | No Filter | 93.72    | 93.56   | 93.72     | 93.44 | 81.38     | 81.41    | 84.05   |
|                                 | Mem-Unif  | 88.86    | 88.56   | 88.86     | 88.32 | 79.49     | 79.19    | 81.58   |
|                                 | Mem-Freq  | 93.24    | 93.02   | 93.24     | 92.92 | 80.39     | 80.42    | 83.2    |
|                                 | Mem-Ex    | 87.42    | 86.9    | 87.42     | 86.7  | 75.49     | 75.29    | 78.19   |
| Roberta base, mlp, random       | No Filter | 64.87    | 67.28   | 64.87     | 63.59 | 43.79     | 44.39    | 52.22   |
|                                 | Mem-Unif  | 49.27    | 53.6    | 49.27     | 47.35 | 40.38     | 40.19    | 48.11   |
|                                 | Mem-Freq  | 63.41    | 65.66   | 63.41     | 61.96 | 40.99     | 41.16    | 48.22   |
|                                 | Mem-Ex    | 44       | 46.93   | 44        | 41.61 | 33.95     | 33.43    | 39.13   |

**Table 12:** PTB-Syn-Dep-Cls test results

| Probe                           | Filter    | Accuracy | Precision | Recall | F1    |
|---------------------------------|-----------|----------|-----------|--------|-------|
| Bert base cased, linear         | No Filter | 69.69    | 74.86     | 59.56  | 66.34 |
|                                 | Mem-Unif  | 66.49    | 71.54     | 62.15  | 66.52 |
|                                 | Mem-Freq  | 69.69    | 73.41     | 61.77  | 67.09 |
|                                 | Mem-Ex    | 66.54    | 70.59     | 65.36  | 67.88 |
| Bert base cased, linear, random | No Filter | 66.42    | 69.28     | 59.36  | 63.94 |
|                                 | Mem-Unif  | 63.13    | 67.38     | 60.41  | 63.71 |
|                                 | Mem-Freq  | 65.93    | 67.86     | 60.58  | 64.01 |
|                                 | Mem-Ex    | 62.66    | 66.49     | 62.41  | 64.39 |
| Roberta base, linear            | No Filter | 72.54    | 72.6      | 72.67  | 72.63 |
|                                 | Mem-Unif  | 68.5     | 69.3      | 74.11  | 71.63 |
|                                 | Mem-Freq  | 71.88    | 70.93     | 74.16  | 72.51 |
|                                 | Mem-Ex    | 67.72    | 67.95     | 76.33  | 71.9  |
| Roberta base, linear, random    | No Filter | 67.39    | 69.18     | 63.06  | 65.98 |
|                                 | Mem-Unif  | 64.25    | 67.46     | 64.43  | 65.91 |
|                                 | Mem-Freq  | 66.81    | 67.66     | 64.41  | 66    |
|                                 | Mem-Ex    | 63.63    | 66.32     | 66.59  | 66.45 |
| Bert base cased, mlp            | No Filter | 83.67    | 82.64     | 85.38  | 83.98 |
|                                 | Mem-Unif  | 80.21    | 80.16     | 83.79  | 81.93 |
|                                 | Mem-Freq  | 82.59    | 81.29     | 84.68  | 82.95 |
|                                 | Mem-Ex    | 79.26    | 79.39     | 83.28  | 81.29 |
| Bert base cased, mlp, random    | No Filter | 76.24    | 73.58     | 82.09  | 77.6  |
|                                 | Mem-Unif  | 73.6     | 72.86     | 80.81  | 76.63 |
|                                 | Mem-Freq  | 75.37    | 72.5      | 81.76  | 76.85 |
|                                 | Mem-Ex    | 72.65    | 72.19     | 80.42  | 76.08 |
| Roberta base, mlp               | No Filter | 85.71    | 83.04     | 89.87  | 86.32 |
|                                 | Mem-Unif  | 82.31    | 80.37     | 88.67  | 84.32 |
|                                 | Mem-Freq  | 84.7     | 81.74     | 89.36  | 85.38 |
|                                 | Mem-Ex    | 81.38    | 79.51     | 88.36  | 83.7  |
| Roberta base, mlp, random       | No Filter | 77.23    | 75.74     | 80.33  | 77.97 |
|                                 | Mem-Unif  | 74.4     | 74.16     | 80.23  | 77.08 |
|                                 | Mem-Freq  | 76.43    | 74.42     | 80.55  | 77.37 |
|                                 | Mem-Ex    | 73.41    | 72.99     | 80.7   | 76.65 |

**Table 13:** EWT-Syn-Dep-Pred test results

| Probe                           | Filter    | Accuracy | Precision | Recall | F1    |
|---------------------------------|-----------|----------|-----------|--------|-------|
| Bert base cased, linear         | No Filter | 68.92    | 67.91     | 71.75  | 69.78 |
|                                 | Mem-Unif  | 65.18    | 65.84     | 62.49  | 64.12 |
|                                 | Mem-Freq  | 68.61    | 71.97     | 67.55  | 69.69 |
|                                 | Mem-Ex    | 64.45    | 71.81     | 54.91  | 62.24 |
| Bert base cased, linear, random | No Filter | 66.3     | 64.03     | 74.41  | 68.83 |
|                                 | Mem-Unif  | 63.86    | 62.48     | 68.61  | 65.4  |
|                                 | Mem-Freq  | 66.1     | 67.23     | 71.28  | 69.2  |
|                                 | Mem-Ex    | 63.14    | 66.23     | 63.05  | 64.6  |
| Roberta base, linear            | No Filter | 69.09    | 68.04     | 72.01  | 69.97 |
|                                 | Mem-Unif  | 65.13    | 65.71     | 62.65  | 64.15 |
|                                 | Mem-Freq  | 68.43    | 71.74     | 67.47  | 69.54 |
|                                 | Mem-Ex    | 63.93    | 70.92     | 54.9   | 61.89 |
| Roberta base, linear, random    | No Filter | 66.58    | 63.85     | 76.43  | 69.57 |
|                                 | Mem-Unif  | 64.5     | 62.54     | 71.54  | 66.74 |
|                                 | Mem-Freq  | 66.64    | 67.09     | 73.69  | 70.24 |
|                                 | Mem-Ex    | 64.2     | 66.35     | 66.75  | 66.55 |
| Bert base cased, mlp            | No Filter | 90.07    | 90.5      | 89.54  | 90.02 |
|                                 | Mem-Unif  | 87.82    | 88.97     | 86.22  | 87.58 |
|                                 | Mem-Freq  | 88.71    | 90.45     | 88.18  | 89.3  |
|                                 | Mem-Ex    | 86.72    | 89.34     | 85.29  | 87.26 |
| Bert base cased, mlp, random    | No Filter | 82.25    | 80.37     | 85.33  | 82.78 |
|                                 | Mem-Unif  | 80.66    | 78.9      | 83.48  | 81.12 |
|                                 | Mem-Freq  | 81.29    | 81.39     | 84.25  | 82.79 |
|                                 | Mem-Ex    | 80.05    | 80.47     | 82.68  | 81.56 |
| Roberta base, mlp               | No Filter | 90.33    | 93.49     | 86.7   | 89.97 |
|                                 | Mem-Unif  | 87.7     | 92.15     | 82.31  | 86.95 |
|                                 | Mem-Freq  | 88.52    | 93.12     | 84.76  | 88.75 |
|                                 | Mem-Ex    | 86.19    | 92.26     | 80.89  | 86.2  |
| Roberta base, mlp, random       | No Filter | 83.29    | 81.38     | 86.33  | 83.78 |
|                                 | Mem-Unif  | 81.88    | 79.99     | 84.81  | 82.33 |
|                                 | Mem-Freq  | 82.42    | 82.49     | 85.18  | 83.81 |
|                                 | Mem-Ex    | 81.17    | 81.44     | 83.8   | 82.6  |

**Table 14:** PTB-Syn-Dep-Pred test results
